# Supplementary material for: Synthesis, crystal structure and luminescent properties of new lanthanide-containing coordination polymers involving 4,4′-oxy-bis-benzoate as ligand
Source: Royal Society of Chemistry journal article supplement (doi:10.1039/c2ce26390d), 2012-11-07
Supplement: c2ce26390d.pdf [file c2ce26390d.pdf]

# Synthesis, Crystal Structure and Luminescent Properties of New Lanthanide-Containing Coordination Polymers Involving 4,4'-oxy-bis-benzoate as Ligand.

*Yun Luo<sup>a,b</sup>, Yanjun Zheng<sup>a,b</sup>, Guillaume Calvez<sup>a,b</sup>, Stéphane Freslon<sup>a,b</sup>, Kevin Bernot<sup>a,b</sup>, Carole Daiguebonne<sup>a,b\*</sup>, Thierry Roisnel<sup>a,c</sup> and Olivier Guillou<sup>a,b</sup>*

<sup>a</sup>Université européenne de Bretagne, France.

<sup>b</sup>INSA, UMR 6226 "Institut des Sciences Chimiques de Rennes", F-35708 Rennes.

<sup>c</sup>Université de Rennes 1, UMR 6226 "Institut des Sciences Chimiques de Rennes", F-35042 Rennes.

## SUPPLEMENTARY

**Table S1 :** Cell parameters for  $[\text{Ln}_2(\text{oba})_3(\text{H}_2\text{O})_5, \text{H}_2\text{O}]_\infty$  with Ln = La - Pr.

| Cell parameters | La         | Ce     | Pr     | Nd     |
|-----------------|------------|--------|--------|--------|
| a (Å)           | 23.622(4)  | 23.58  | 23.51  | 23.51  |
| b (Å)           | 6.066(1)   | 6.03   | 6.01   | 5.99   |
| c (Å)           | 29.414(6)  | 29.33  | 29.28  | 29.32  |
| $\beta$ (°)     | 102.034(7) | 101.96 | 101.82 | 101.79 |

**Table S2.** Chemical analysis for  $[\text{Ln}_2(\text{oba})_3(\text{H}_2\text{O})_5, \text{H}_2\text{O}]_\infty$  with Ln = La - Pr.

| Ln | MW[gmol <sup>-1</sup> ] | Ln [%]      | Anal. Calculated (found) |             |           |
|----|-------------------------|-------------|--------------------------|-------------|-----------|
|    |                         |             | O [%]                    | C [%]       | H [%]     |
| La | 1154.53                 | 24.1 (23.3) | 29.1 (30.7)              | 43.7 (42.5) | 3.1 (3.3) |
| Ce | 1156.95                 | 24.2 (23.7) | 29.0 (31.0)              | 43.6 (42.0) | 3.2 (3.3) |
| Pr | 1158.54                 | 24.3 (23.5) | 29.0 (30.9)              | 43.5 (42.0) | 3.2 (3.6) |
| Nd | 1165.20                 | 24.7 (23.8) | 28.8 (30.5)              | 43.3 (42.2) | 3.2 (3.5) |

**Table S3.** Chemical analysis for  $[\text{Ln}_2(\text{oba})_3(\text{H}_2\text{O})_6, 3\text{H}_2\text{O}]_\infty$  with Ln = Sm - Ho or Y.

| Ln | MW[gmol <sup>-1</sup> ] | Ln [%]      | Anal. Calculated (found) |             |           |
|----|-------------------------|-------------|--------------------------|-------------|-----------|
|    |                         |             | O [%]                    | C [%]       | H [%]     |
| Sm | 1231.50                 | 24.4 (24.3) | 31.2 (31.2)              | 41.0 (41.1) | 3.4 (3.4) |
| Eu | 1234.71                 | 24.6 (24.6) | 31.1 (31.0)              | 40.9 (41.0) | 3.4 (3.4) |
| Gd | 1245.30                 | 25.3 (25.5) | 30.8 (30.8)              | 40.5 (40.4) | 3.4 (3.3) |
| Tb | 1248.63                 | 25.4 (25.5) | 30.8 (30.9)              | 40.4 (40.4) | 3.4 (3.2) |
| Dy | 1255.78                 | 25.9 (26.1) | 30.5 (30.3)              | 40.2 (40.1) | 3.4 (3.5) |
| Ho | 1260.64                 | 26.2 (26.0) | 30.5 (30.7)              | 40.0 (40.1) | 3.3 (3.2) |
| Y  | 1108.59                 | 16.1 (16.0) | 34.6 (34.5)              | 45.5 (45.7) | 3.8 (3.8) |

**Table S4.** Chemical analysis for  $[\text{Ln}_2(\text{oba})_3(\text{H}_2\text{O})_{5.5}, 0.5\text{H}_2\text{O}]_\infty$  with Ln = Sm - Dy.

| Ln | MW[gmol <sup>-1</sup> ] | Ln [%]      | Anal. Calculated (found) |             |           |
|----|-------------------------|-------------|--------------------------|-------------|-----------|
|    |                         |             | O [%]                    | C [%]       | H [%]     |
| Sm | 1177.50                 | 25.6 (25.5) | 28.5 (28.6)              | 42.8 (42.7) | 3.1 (3.2) |
| Eu | 1180.67                 | 25.7 (25.6) | 28.5 (28.5)              | 42.7 (42.6) | 3.1 (3.3) |
| Gd | 1191.20                 | 26.4 (26.4) | 28.2 (28.1)              | 42.4 (42.5) | 3.0 (3.0) |
| Tb | 1194.59                 | 26.6 (26.5) | 28.1 (28.0)              | 42.3 (42.2) | 3.0 (3.3) |
| Dy | 1201.74                 | 27.0 (27.0) | 28.0 (28.1)              | 42.0 (42.1) | 3.0 (2.8) |

**Table S5.** Crystallogenesis conditions for family 1.

| Synthesis conditions |                | La                                                                                | Ce                                                                                | Pr                                                                                  | Nd                                                                                  |
|----------------------|----------------|-----------------------------------------------------------------------------------|-----------------------------------------------------------------------------------|-------------------------------------------------------------------------------------|-------------------------------------------------------------------------------------|
| U-tube               | Agar-Agar 0.1% |  |                                                                                   |                                                                                     |                                                                                     |
|                      | Agar-Agar 0.2% |  |                                                                                   |  |                                                                                     |
|                      | Agar-Agar 0.3% |  |  |  |                                                                                     |
|                      | TEOS 7.5%      |                                                                                   |  |  |  |

**Table S6.** Crystallogenesis conditions for Family 2.

| Synthesis conditions |                | Gd                                                                                | Tb                                                                                | Er                                                                                  | Ho                                                                                  |
|----------------------|----------------|-----------------------------------------------------------------------------------|-----------------------------------------------------------------------------------|-------------------------------------------------------------------------------------|-------------------------------------------------------------------------------------|
| U-tube               | Agar-Agar 0.1% |  |                                                                                   |                                                                                     |                                                                                     |
|                      | TEOS 7.5%      |                                                                                   |  |  |  |

**Table S7.** Crystallogenesis conditions for Family 3.

| Synthesis conditions |                | Sm                                                                                  | Eu                                                                                  | Gd                                                                                  | Tb                                                                                  | Dy                                                                                   | Y                                                                                     | Ho                                                                                    | Er                                                                                    |
|----------------------|----------------|-------------------------------------------------------------------------------------|-------------------------------------------------------------------------------------|-------------------------------------------------------------------------------------|-------------------------------------------------------------------------------------|--------------------------------------------------------------------------------------|---------------------------------------------------------------------------------------|---------------------------------------------------------------------------------------|---------------------------------------------------------------------------------------|
| U-tube               | Agar-Agar 0.2% |                                                                                     |                                                                                     |    |                                                                                     |                                                                                      |                                                                                       |                                                                                       |                                                                                       |
|                      | TEOS 7.5%      |                                                                                     |                                                                                     |   |                                                                                     |   |                                                                                       |   |                                                                                       |
| H-tube               |                |  |  |  |  |  |  |  |  |

The darkened cases indicate the single crystals that have been used for solving the crystal structures

**Table S8** : Interatomic distances for H-bonds in  $[\text{La}_2(\text{oba})_3(\text{H}_2\text{O})_5, \text{H}_2\text{O}]_\infty$

| Atom1 | Atom2 | Symmetry code | Distance (Å) |
|-------|-------|---------------|--------------|
| O14   | OW1   | x, 1+y, z     | 2.729(4)     |
| O14   | OW1   | -x, 1-y, 1-z  | 2.759(1)     |
| OW1   | O201  | x, y, z       | 2.822(4)     |
| O201  | O15   | x, y, z       | 2.964(4)     |
| O201  | O203  | x, y, z       | 3.054(7)     |
| O203  | O201  | x, y, z       | 3.054(7)     |
| O203  | OW1   | -x, 1-y, 1-z  | 2.725(8)     |
| O14   | O203  | -x, 1-y, 1-z  | 2.777(7)     |
| O203  | O51   | x, y, z       | 2.770(7)     |

**Table S9** : Interatomic distances for H-bonds in  $[\text{Gd}_2(\text{oba})_3(\text{H}_2\text{O})_6, 3\text{H}_2\text{O}]_\infty$

| Atom1 | Atom2 | Symmetry code    | Distance (Å) |
|-------|-------|------------------|--------------|
| O12   | OW1   | 0.5+x, -0.5-y, z | 2.886(1)     |
| OW1   | OW2   | x, y, z          | 2.567(1)     |
| O15   | OW3   | 0.5+x, -0.5-y, z | 2.88(1)      |
